# Supplementary material for: Chiral amino acid-templated tin fluorides tailoring nonlinear optical properties, birefringence, and photoluminescence
Source: Royal Society of Chemistry journal article supplement (doi:10.1039/d3dt03257d), 2023-11-30

Electronic Supplementary Information (ESI) for

**Chiral amino acid-templated tin fluorides tailoring nonlinear optical  
properties, birefringence, and photoluminescence**

Ahyung Jung, Yang Li, and Kang Min Ok\*

Department of Chemistry, Sogang University, Seoul 04107, Republic of Korea

\*E-mail: [kmok@sogang.ac.kr](mailto:kmok@sogang.ac.kr)

## Table of contents

| Sections         | Titles                                                                                                                                                      | Pages   |
|------------------|-------------------------------------------------------------------------------------------------------------------------------------------------------------|---------|
| <b>Fig. S1</b>   | Experimental and calculated powder X-ray diffraction patterns of ( <i>R</i> )-Sn(II) and ( <i>S</i> )-Sn(II).                                               | S3      |
| <b>Fig. S2</b>   | Experimental and calculated powder X-ray diffraction patterns of ( <i>R</i> )-Sn(IV) and ( <i>S</i> )-Sn(IV), and photograph of an as-grown single crystal. | S4      |
| <b>Table S1</b>  | Crystallographic data for ( <i>R</i> )-Sn(II), ( <i>S</i> )-Sn(II), ( <i>R</i> )-Sn(IV), and ( <i>S</i> )-Sn(IV).                                           | S5      |
| <b>Table S2</b>  | Selected bond distances (Å) and bond angles (°) for ( <i>R</i> )-Sn(II).                                                                                    | S6-S7   |
| <b>Table S3</b>  | Hydrogen bond distances (Å) for ( <i>R</i> )-Sn(II).                                                                                                        | S8      |
| <b>Table S4</b>  | Selected bond distance (Å) and bond angles (°) for ( <i>S</i> )-Sn(II).                                                                                     | S9-S10  |
| <b>Table S5</b>  | Hydrogen bond distances (Å) for ( <i>S</i> )-Sn(II).                                                                                                        | S11     |
| <b>Table S6</b>  | Selected bond distance (Å) and bond angles (°) for ( <i>R</i> )-Sn(IV).                                                                                     | S12-S13 |
| <b>Table S7</b>  | Hydrogen bond distances (Å) for ( <i>R</i> )-Sn(IV).                                                                                                        | S14     |
| <b>Table S8</b>  | Selected bond distance (Å) and bond angles (°) for ( <i>S</i> )-Sn(IV).                                                                                     | S15-S16 |
| <b>Table S9</b>  | Hydrogen bond distances (Å) for ( <i>S</i> )-Sn(IV).                                                                                                        | S17     |
| <b>Fig. S3</b>   | TGA diagrams for ( <i>R</i> )-Sn(II)/( <i>S</i> )-Sn(II) and ( <i>R</i> )-Sn(IV)/( <i>S</i> )-Sn(IV).                                                       | S18     |
| <b>Fig. S4</b>   | PXRD patterns measured after heating the samples to 700 °C.                                                                                                 | S19     |
| <b>Table S10</b> | EA data for ( <i>R</i> )-Sn(II), ( <i>S</i> )-Sn(II), ( <i>R</i> )-Sn(IV), and ( <i>S</i> )-Sn(IV).                                                         | S20     |
| <b>Fig. S5</b>   | UV-vis diffuse reflectance spectra for D-HPG, L-HPG, ( <i>R</i> )-Sn(II), ( <i>S</i> )-Sn(II), ( <i>R</i> )-Sn(IV), and ( <i>S</i> )-Sn(IV).                | S21     |
| <b>Fig. S6</b>   | IR spectra for ( <i>R</i> )-Sn(II), ( <i>S</i> )-Sn(II), ( <i>R</i> )-Sn(IV), and ( <i>S</i> )-Sn(IV).                                                      | S22     |
| <b>Table S11</b> | Calculated dipole moments of ( <i>R</i> )-Sn(II) and ( <i>R</i> )-Sn(IV).                                                                                   | S23     |
| <b>Fig. S7</b>   | Dipole moments and a net direction of SnF <sub>3</sub> trigonal pyramids in a unit cell for ( <i>R</i> )-Sn(II).                                            | S24     |
| <b>Fig. S8</b>   | Dipole moments and a net direction of SnF <sub>6</sub> octahedra in a unit cell for ( <i>R</i> )-Sn(IV).                                                    | S25     |
| <b>Fig. S9</b>   | Solid-state CD spectra of D-HPG, L-HPG, ( <i>R</i> )-Sn(II), ( <i>S</i> )-Sn(II), ( <i>R</i> )-Sn(IV), and ( <i>S</i> )-Sn(IV).                             | S26     |
| <b>Fig. S10</b>  | Band structures for ( <i>R</i> )-Sn(II), ( <i>S</i> )-Sn(II), ( <i>R</i> )-Sn(IV), and ( <i>S</i> )-Sn(IV).                                                 | S27     |
| <b>Fig. S11</b>  | Total and partial density of states for ( <i>R</i> )-Sn(II), ( <i>S</i> )-Sn(II), ( <i>R</i> )-Sn(IV), and ( <i>S</i> )-Sn(IV).                             | S28     |
| <b>Fig. S12</b>  | PXRD patterns revealing the stability of ( <i>R</i> )-Sn(IV) in various solvents.                                                                           | S29     |

**Fig. S1** Experimental and calculated powder X-ray diffraction patterns of (*R*)-Sn(II) and (*S*)-Sn(II).

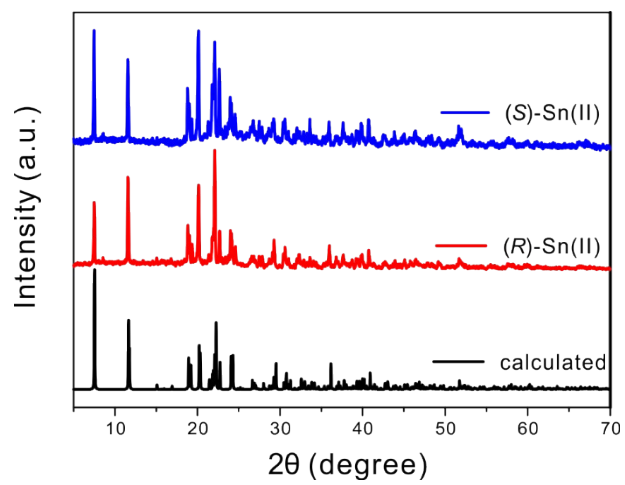

**Fig. S2** (a) Experimental and calculated powder X-ray diffraction patterns of (*R*)-Sn(IV) and (*S*)-Sn(IV), and (b) photograph of an as-grown single crystal.

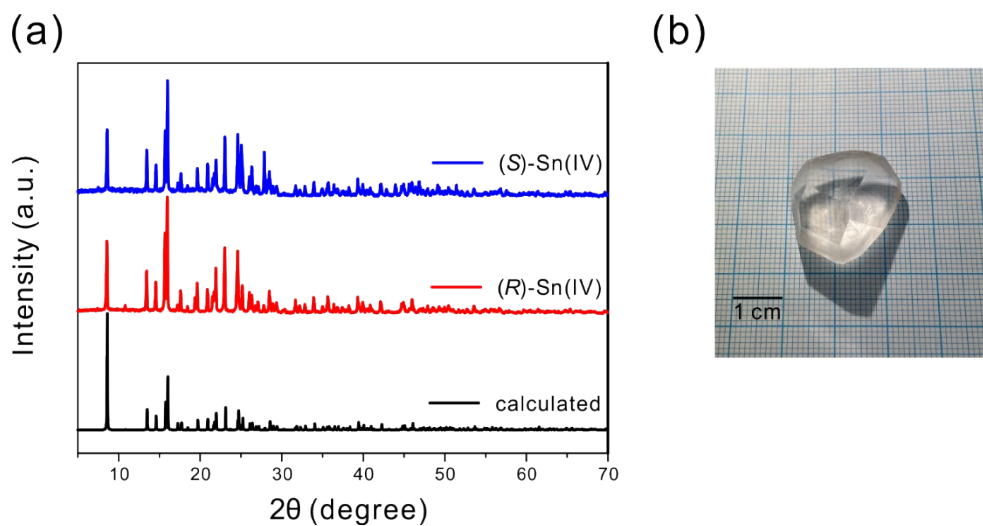

**Table S1.** Crystallographic data for (*R*)-Sn(II), (*S*)-Sn(II), (*R*)-Sn(IV), and (*S*)-Sn(IV).

|                                                                           | ( <i>R</i> )-Sn(II)                                             | ( <i>S</i> )-Sn(II)     | ( <i>R</i> )-Sn(IV)                                                            | ( <i>S</i> )-Sn(IV)                      |
|---------------------------------------------------------------------------|-----------------------------------------------------------------|-------------------------|--------------------------------------------------------------------------------|------------------------------------------|
| formula                                                                   | C <sub>8</sub> H <sub>10</sub> NO <sub>3</sub> SnF <sub>3</sub> |                         | C <sub>16</sub> H <sub>20</sub> N <sub>2</sub> O <sub>6</sub> SnF <sub>6</sub> |                                          |
| fw                                                                        | 343.86                                                          | 343.86                  | 569.03                                                                         | 569.03                                   |
| Space group                                                               | <i>P</i> 2 <sub>1</sub>                                         | <i>P</i> 2 <sub>1</sub> | <i>P</i> 2 <sub>1</sub> 2 <sub>1</sub> 2                                       | <i>P</i> 2 <sub>1</sub> 2 <sub>1</sub> 2 |
| <i>a</i> (Å)                                                              | 7.9805(2)                                                       | 7.9798(3)               | 13.4115(4)                                                                     | 13.4225(4)                               |
| <i>b</i> (Å)                                                              | 5.8498(2)                                                       | 5.8516(2)               | 7.5092(2)                                                                      | 7.5081(2)                                |
| <i>c</i> (Å)                                                              | 23.4594(7)                                                      | 23.4718(9)              | 10.2740(3)                                                                     | 10.2706(3)                               |
| $\alpha$ (°)                                                              | 90                                                              | 90                      | 90                                                                             | 90                                       |
| $\beta$ (°)                                                               | 90.8340(10)                                                     | 90.8650(10)             | 90                                                                             | 90                                       |
| $\gamma$ (°)                                                              | 90                                                              | 90                      | 90                                                                             | 90                                       |
| <i>V</i> (Å <sup>3</sup> )                                                | 1095.07(6)                                                      | 1095.88(7)              | 1034.69(5)                                                                     | 1035.05(5)                               |
| <i>Z</i>                                                                  | 4                                                               | 4                       | 2                                                                              | 2                                        |
| <i>T</i> (K)                                                              | 150(2)                                                          | 150(2)                  | 150(2)                                                                         | 150(2)                                   |
| $\lambda$ (Å)                                                             | 0.71073                                                         | 0.71073                 | 0.71073                                                                        | 0.71073                                  |
| $\rho_{\text{calcd}}$ (g/cm <sup>3</sup> )                                | 2.086                                                           | 2.084                   | 1.826                                                                          | 1.826                                    |
| <i>R</i> ( <i>F</i> <sub>o</sub> ) <sup>a</sup>                           | 0.0280                                                          | 0.0321                  | 0.0176                                                                         | 0.0237                                   |
| <i>R</i> <sub>w</sub> ( <i>F</i> <sub>o</sub> <sup>2</sup> ) <sup>b</sup> | 0.0659                                                          | 0.0793                  | 0.0459                                                                         | 0.0587                                   |
| Flack <i>x</i>                                                            | 0.113(15)                                                       | 0.11(3)                 | 0.09(2)                                                                        | 0.11(3)                                  |

---

$$^a R(F) = \Sigma ||F_o| - |F_c|| / \Sigma |F_o|. \quad ^b R_w(F_o^2) = [\Sigma w(F_o^2 - F_c^2)^2 / \Sigma w(F_o^2)^2]^{1/2}.$$

**Table S2.** Selected bond distances (Å) and bond angles (°) for (*R*)-Sn(II).

| Selected bond distances (Å) |           |                 |          |
|-----------------------------|-----------|-----------------|----------|
| Sn(1)-F(2)                  | 2.029(3)  | C(7)-C(8)       | 1.526(7) |
| Sn(1)-F(1)                  | 2.078(3)  | C(8)-O(4)       | 1.211(7) |
| Sn(1)-F(3)                  | 2.107(3)  | C(8)-O(6)       | 1.310(6) |
| Sn(2)-F(5)                  | 2.023(3)  | C(9)-O(2)       | 1.365(7) |
| Sn(2)-F(4)                  | 2.075(3)  | C(9)-C(10)      | 1.380(9) |
| Sn(2)-F(6)                  | 2.099(4)  | C(9)-C(14)      | 1.381(9) |
| C(1)-O(5)                   | 1.359(7)  | C(10)-C(11)     | 1.388(9) |
| C(1)-C(6)                   | 1.383(9)  | C(11)-C(12)     | 1.385(8) |
| C(1)-C(2)                   | 1.385(9)  | C(12)-C(13)     | 1.391(8) |
| C(2)-C(3)                   | 1.397(8)  | C(12)-C(15)     | 1.523(7) |
| C(3)-C(4)                   | 1.389(8)  | C(13)-C(14)     | 1.393(8) |
| C(4)-C(5)                   | 1.393(7)  | C(15)-N(2)      | 1.491(7) |
| C(4)-C(7)                   | 1.517(7)  | C(15)-C(16)     | 1.518(7) |
| C(5)-C(6)                   | 1.388(8)  | C(16)-O(3)      | 1.204(7) |
| C(7)-N(1)                   | 1.491(7)  | C(16)-O(1)      | 1.312(7) |
| Selected bond angles (°)    |           |                 |          |
| F(2)-Sn(1)-F(1)             | 84.20(14) | O(4)-C(8)-O(6)  | 125.2(5) |
| F(2)-Sn(1)-F(3)             | 81.82(13) | O(4)-C(8)-C(7)  | 122.6(5) |
| F(1)-Sn(1)-F(3)             | 87.79(14) | O(6)-C(8)-C(7)  | 112.1(5) |
| F(5)-Sn(2)-F(4)             | 83.95(14) | O(2)-C(9)-C(10) | 116.8(6) |
| F(5)-Sn(2)-F(6)             | 81.68(14) | O(2)-C(9)-C(14) | 122.9(5) |

|                 |           |                   |          |
|-----------------|-----------|-------------------|----------|
| F(4)-Sn(2)-F(6) | 88.86(14) | C(10)-C(9)-C(14)  | 120.3(5) |
| O(5)-C(1)-C(6)  | 117.8(6)  | C(9)-C(10)-C(11)  | 119.4(6) |
| O(5)-C(1)-C(2)  | 122.0(6)  | C(12)-C(11)-C(10) | 121.2(6) |
| C(6)-C(1)-C(2)  | 120.2(5)  | C(11)-C(12)-C(13) | 119.0(5) |
| C(1)-C(2)-C(3)  | 119.5(6)  | C(11)-C(12)-C(15) | 119.3(5) |
| C(4)-C(3)-C(2)  | 120.4(5)  | C(13)-C(12)-C(15) | 121.5(5) |
| C(3)-C(4)-C(5)  | 119.5(5)  | C(12)-C(13)-C(14) | 120.0(6) |
| C(3)-C(4)-C(7)  | 122.0(5)  | C(9)-C(14)-C(13)  | 120.1(6) |
| C(5)-C(4)-C(7)  | 118.5(5)  | N(2)-C(15)-C(16)  | 107.8(5) |
| C(6)-C(5)-C(4)  | 119.9(6)  | N(2)-C(15)-C(12)  | 109.8(4) |
| C(1)-C(6)-C(5)  | 120.4(6)  | C(16)-C(15)-C(12) | 113.1(4) |
| N(1)-C(7)-C(4)  | 110.9(4)  | O(3)-C(16)-O(1)   | 125.8(5) |
| N(1)-C(7)-C(8)  | 107.4(4)  | O(3)-C(16)-C(15)  | 122.1(5) |
| C(4)-C(7)-C(8)  | 111.3(5)  | O(1)-C(16)-C(15)  | 112.1(5) |

---





**Table S4.** Selected bond distances (Å) and bond angles (°) for (*S*)-Sn(II).

| Selected bond distances (Å) |           |             |           |
|-----------------------------|-----------|-------------|-----------|
| F(2)-Sn(1)                  | 2.028(4)  | C(7)-C(8)   | 1.537(8)  |
| F(3)-Sn(1)                  | 2.113(4)  | C(8)-O(4)   | 1.206(8)  |
| F(4)-Sn(2)                  | 2.073(4)  | C(8)-O(6)   | 1.311(7)  |
| F(5)-Sn(2)                  | 2.028(4)  | C(9)-O(2)   | 1.369(7)  |
| F(6)-Sn(2)                  | 2.100(4)  | C(9)-C(14)  | 1.383(9)  |
| Sn(1)-F(1)                  | 2.085(4)  | C(9)-C(10)  | 1.396(10) |
| C(2)-C(1)                   | 1.386(10) | C(10)-C(11) | 1.388(9)  |
| C(2)-C(3)                   | 1.393(9)  | C(11)-C(12) | 1.389(8)  |
| C(1)-O(5)                   | 1.358(7)  | C(12)-C(13) | 1.388(8)  |
| C(1)-C(6)                   | 1.388(9)  | C(12)-C(15) | 1.519(8)  |
| C(3)-C(4)                   | 1.389(8)  | C(13)-C(14) | 1.389(8)  |
| C(4)-C(5)                   | 1.384(8)  | C(15)-N(2)  | 1.497(7)  |
| C(4)-C(7)                   | 1.523(7)  | C(15)-C(16) | 1.498(8)  |
| C(5)-C(6)                   | 1.405(8)  | C(16)-O(3)  | 1.227(8)  |
| C(7)-N(1)                   | 1.483(8)  | C(16)-O(1)  | 1.306(7)  |

  

| Selected bond angles (°) |           |                 |          |
|--------------------------|-----------|-----------------|----------|
| F(2)-Sn(1)-F(1)          | 84.27(15) | O(4)-C(8)-O(6)  | 126.0(5) |
| F(2)-Sn(1)-F(3)          | 81.71(14) | O(4)-C(8)-C(7)  | 122.0(5) |
| F(1)-Sn(1)-F(3)          | 87.63(14) | O(6)-C(8)-C(7)  | 112.0(5) |
| F(5)-Sn(2)-F(4)          | 83.83(15) | O(2)-C(9)-C(14) | 123.2(6) |
| F(5)-Sn(2)-F(6)          | 81.77(15) | O(2)-C(9)-C(10) | 116.5(6) |

|                 |           |                   |          |
|-----------------|-----------|-------------------|----------|
| F(4)-Sn(2)-F(6) | 88.89(16) | C(14)-C(9)-C(10)  | 120.3(6) |
| C(1)-C(2)-C(3)  | 120.1(6)  | C(11)-C(10)-C(9)  | 119.3(6) |
| O(5)-C(1)-C(2)  | 117.5(6)  | C(10)-C(11)-C(12) | 120.8(6) |
| O(5)-C(1)-C(6)  | 122.4(6)  | C(13)-C(12)-C(11) | 119.2(5) |
| C(2)-C(1)-C(6)  | 120.1(5)  | C(13)-C(12)-C(15) | 121.6(6) |
| C(4)-C(3)-C(2)  | 120.3(6)  | C(11)-C(12)-C(15) | 118.9(6) |
| C(5)-C(4)-C(3)  | 119.4(5)  | C(12)-C(13)-C(14) | 120.5(6) |
| C(5)-C(4)-C(7)  | 121.8(5)  | C(9)-C(14)-C(13)  | 119.9(6) |
| C(3)-C(4)-C(7)  | 118.8(5)  | N(2)-C(15)-C(16)  | 108.4(5) |
| C(4)-C(5)-C(6)  | 120.6(6)  | N(2)-C(15)-C(12)  | 110.2(5) |
| C(1)-C(6)-C(5)  | 119.4(6)  | C(16)-C(15)-C(12) | 113.4(5) |
| N(1)-C(7)-C(4)  | 110.9(5)  | O(3)-C(16)-O(1)   | 124.7(5) |
| N(1)-C(7)-C(8)  | 107.8(5)  | O(3)-C(16)-C(15)  | 122.0(5) |
| C(4)-C(7)-C(8)  | 111.3(5)  | O(1)-C(16)-C(15)  | 113.3(5) |

---



**Table S6.** Selected bond distances (Å) and bond angles (°) for (*R*)-Sn(IV).

| Selected bond distances (Å) |            |                |            |
|-----------------------------|------------|----------------|------------|
| Sn(1)-F(2)#1                | 1.9448(14) | N(1)-C(7)      | 1.493(3)   |
| Sn(1)-F(2)                  | 1.9448(14) | C(1)-C(6)      | 1.389(4)   |
| Sn(1)-F(1)#1                | 1.9608(14) | C(1)-C(2)      | 1.389(3)   |
| Sn(1)-F(1)                  | 1.9608(14) | C(2)-C(3)      | 1.388(3)   |
| Sn(1)-F(3)#1                | 1.9680(15) | C(3)-C(4)      | 1.399(3)   |
| Sn(1)-F(3)                  | 1.9680(15) | C(4)-C(5)      | 1.392(3)   |
| O(1)-C(1)                   | 1.371(3)   | C(4)-C(7)      | 1.513(3)   |
| O(2)-C(8)                   | 1.206(3)   | C(5)-C(6)      | 1.397(3)   |
| O(3)-C(8)                   | 1.315(3)   | C(7)-C(8)      | 1.530(4)   |
| Selected bond angles (°)    |            |                |            |
| F(2)#1-Sn(1)-F(2)           | 92.83(9)   | O(1)-C(1)-C(2) | 116.2(2)   |
| F(2)#1-Sn(1)-F(1)#1         | 88.67(7)   | C(6)-C(1)-C(2) | 120.5(2)   |
| F(2)-Sn(1)-F(1)#1           | 91.82(7)   | C(3)-C(2)-C(1) | 120.2(2)   |
| F(2)#1-Sn(1)-F(1)           | 91.82(7)   | C(2)-C(3)-C(4) | 120.0(2)   |
| F(2)-Sn(1)-F(1)             | 88.67(7)   | C(5)-C(4)-C(3) | 119.4(2)   |
| F(1)#1-Sn(1)-F(1)           | 179.29(9)  | C(5)-C(4)-C(7) | 119.8(2)   |
| F(2)#1-Sn(1)-F(3)#1         | 174.53(7)  | C(3)-C(4)-C(7) | 120.8(2)   |
| F(2)-Sn(1)-F(3)#1           | 90.89(7)   | C(4)-C(5)-C(6) | 120.8(2)   |
| F(1)#1-Sn(1)-F(3)#1         | 87.20(6)   | C(1)-C(6)-C(5) | 119.2(2)   |
| F(1)-Sn(1)-F(3)#1           | 92.28(6)   | N(1)-C(7)-C(4) | 112.8(2)   |
| F(2)#1-Sn(1)-F(3)           | 90.89(7)   | N(1)-C(7)-C(8) | 105.52(19) |

|                   |           |                |            |
|-------------------|-----------|----------------|------------|
| F(2)-Sn(1)-F(3)   | 174.53(7) | C(4)-C(7)-C(8) | 114.0(2)   |
| F(1)#1-Sn(1)-F(3) | 92.28(6)  | O(2)-C(8)-O(3) | 125.2(3)   |
| F(1)-Sn(1)-F(3)   | 87.20(6)  | O(2)-C(8)-C(7) | 121.7(2)   |
| F(3)#1-Sn(1)-F(3) | 85.69(10) | O(3)-C(8)-C(7) | 113.03(19) |
| O(1)-C(1)-C(6)    | 123.3(2)  |                |            |

---

Symmetry operation: #1 -x+1,-y,z

---

**Table S7.** Hydrogen bond distances (Å) for (*R*)-Sn(IV)

| D-H...A                                                                | d(D...A) | D-H...A             | d(D...A) |
|------------------------------------------------------------------------|----------|---------------------|----------|
| N(1)-H(1N)...F(1)#2                                                    | 2.972(3) | N(1)-H(3N)...O(1)#5 | 2.887(3) |
| N(1)-H(1N)...O(2)#3                                                    | 2.752(3) | O(1)-H(1O)...F(1)#6 | 2.699(2) |
| N(1)-H(2N)...F(2)#4                                                    | 2.825(3) | O(3)-H(3O)...F(3)   | 2.559(2) |
| Symmetry operation: #1 -x+1,-y,z    #2 x,y+1,z    #3 -x+1/2,y+1/2,-z+2 |          |                     |          |
| #4 x-1/2,-y+1/2,-z+2    #5 -x+1/2,y+1/2,-z+1    #6 x,y+1,z-1           |          |                     |          |

**Table S8.** Selected bond distances (Å) and bond angles (°) for (*S*)-Sn(IV).

| Selected bond distances (Å) |          |            |          |
|-----------------------------|----------|------------|----------|
| C(1)-O(1)                   | 1.371(4) | F(3)-Sn(1) | 1.965(2) |
| C(1)-C(6)                   | 1.383(5) | C(2)-C(3)  | 1.389(5) |
| C(1)-C(2)                   | 1.387(5) | C(3)-C(4)  | 1.392(5) |
| N(1)-C(7)                   | 1.496(4) | C(4)-C(5)  | 1.395(5) |
| O(2)-C(8)                   | 1.205(4) | C(4)-C(7)  | 1.508(5) |
| O(3)-C(8)                   | 1.312(5) | C(5)-C(6)  | 1.395(5) |
| F(1)-Sn(1)                  | 1.958(2) | C(7)-C(8)  | 1.527(6) |
| F(2)-Sn(1)                  | 1.941(2) |            |          |

  

| Selected bond angles (°) |            |                   |           |
|--------------------------|------------|-------------------|-----------|
| O(1)-C(1)-C(6)           | 123.2(3)   | F(1)-Sn(1)-F(3)   | 92.12(9)  |
| O(1)-C(1)-C(2)           | 115.9(3)   | F(3)#1-Sn(1)-F(3) | 85.65(14) |
| C(6)-C(1)-C(2)           | 120.9(3)   | C(1)-C(2)-C(3)    | 119.9(3)  |
| F(2)-Sn(1)-F(2)#1        | 92.91(14)  | C(2)-C(3)-C(4)    | 120.3(3)  |
| F(2)-Sn(1)-F(1)#1        | 88.80(10)  | C(3)-C(4)-C(5)    | 119.0(3)  |
| F(2)#1-Sn(1)-F(1)#1      | 91.77(10)  | C(3)-C(4)-C(7)    | 121.1(3)  |
| F(2)-Sn(1)-F(1)          | 91.76(10)  | C(5)-C(4)-C(7)    | 119.9(3)  |
| F(2)#1-Sn(1)-F(1)        | 88.80(10)  | C(4)-C(5)-C(6)    | 121.0(3)  |
| F(1)#1-Sn(1)-F(1)        | 179.17(13) | C(1)-C(6)-C(5)    | 118.9(3)  |
| F(2)-Sn(1)-F(3)#1        | 90.85(10)  | N(1)-C(7)-C(4)    | 112.9(3)  |
| F(2)#1-Sn(1)-F(3)#1      | 174.65(11) | N(1)-C(7)-C(8)    | 105.7(3)  |
| F(1)#1-Sn(1)-F(3)#1      | 92.11(10)  | C(4)-C(7)-C(8)    | 114.1(3)  |

|                   |            |                |          |
|-------------------|------------|----------------|----------|
| F(1)-Sn(1)-F(3)#1 | 87.28(9)   | O(2)-C(8)-O(3) | 125.4(4) |
| F(2)-Sn(1)-F(3)   | 174.65(11) | O(2)-C(8)-C(7) | 121.6(4) |
| F(2)#1-Sn(1)-F(3) | 90.85(10)  | O(3)-C(8)-C(7) | 113.0(3) |
| F(1)#1-Sn(1)-F(3) | 87.28(9)   |                |          |

---

Symmetry operation: #1 -x+1,-y+2,z

---



**Table S9.** Hydrogen bond distances (Å) for (*S*)-Sn(IV).

| D-H...A             | d(D...A) | D-H...A             | d(D...A) |
|---------------------|----------|---------------------|----------|
| O(1)-H(1O)...F(1)#2 | 2.703(3) | N(1)-H(2N)...F(1)#4 | 2.974(4) |
| O(3)-H(3O)...F(3)   | 2.558(4) | N(1)-H(3N)...O(1)#5 | 2.888(4) |
| N(1)-H(2N)...O(2)#3 | 2.749(4) | N(1)-H(1N)...F(2)#6 | 2.826(4) |

Symmetry operation: #1 -x+1,-y+2,z    #2 -x+1,-y+1,z-1    #3 -x+1/2,y-1/2,-z+2  
#4 -x+1,-y+1,z    #5 -x+1/2,y-1/2,-z+1    #6 x-1/2,-y+3/2,-z+2

**Fig. S3** TGA diagrams for (a) (*R*)-Sn(II)/(*S*)-Sn(II) and (b) (*R*)-Sn(IV)/(*S*)-Sn(IV).

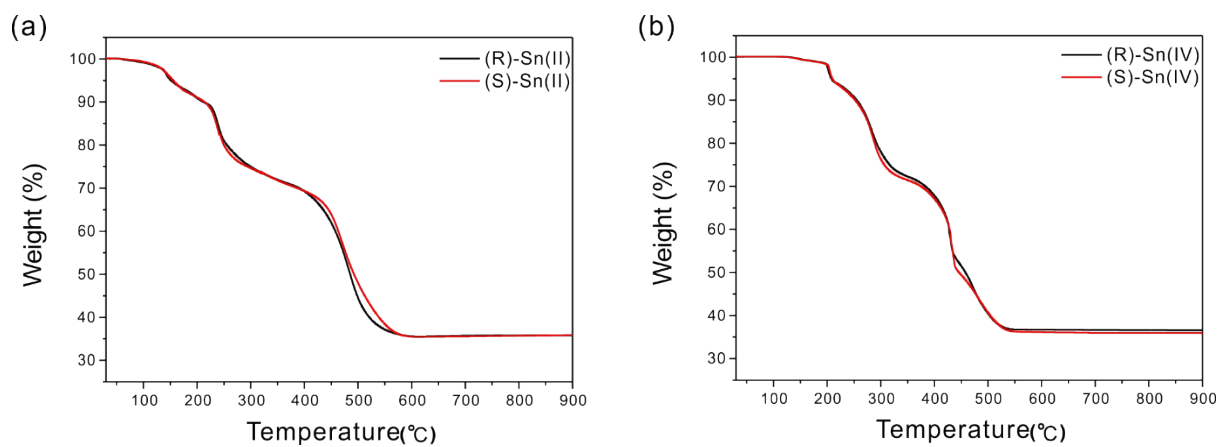

**Fig. S4** PXRD patterns measured after heating the samples to 700 °C.

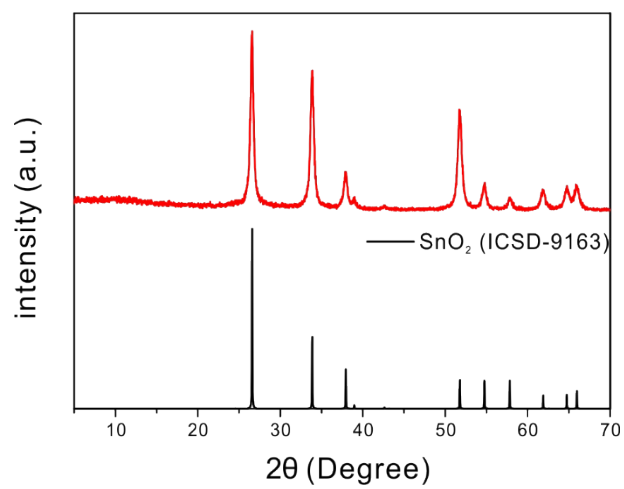

**Table S10.** EA data for (*R*)-Sn(II), (*S*)-Sn(II), (*R*)-Sn(IV), and (*S*)-Sn(IV).

| Element | Calculated | Experimental        |                     |
|---------|------------|---------------------|---------------------|
|         |            | ( <i>R</i> )-Sn(II) | ( <i>S</i> )-Sn(II) |
| N       | 4.07       | 3.91                | 3.95                |
| C       | 27.92      | 27.02               | 27.54               |
| H       | 2.91       | 2.96                | 2.88                |
| Totals  | 34.90      | 33.89               | 34.37               |

| Element | Calculated | Experimental        |                     |
|---------|------------|---------------------|---------------------|
|         |            | ( <i>R</i> )-Sn(IV) | ( <i>S</i> )-Sn(IV) |
| N       | 4.92       | 4.81                | 4.84                |
| C       | 33.74      | 33.63               | 33.74               |
| H       | 3.51       | 3.64                | 3.63                |
| Totals  | 42.17      | 42.09               | 42.21               |

**Fig. S5** UV-vis diffuse reflectance spectra for D-HPG, L-HPG, (*R*)-Sn(II), (*S*)-Sn(II), (*R*)-Sn(IV), and (*S*)-Sn(IV).

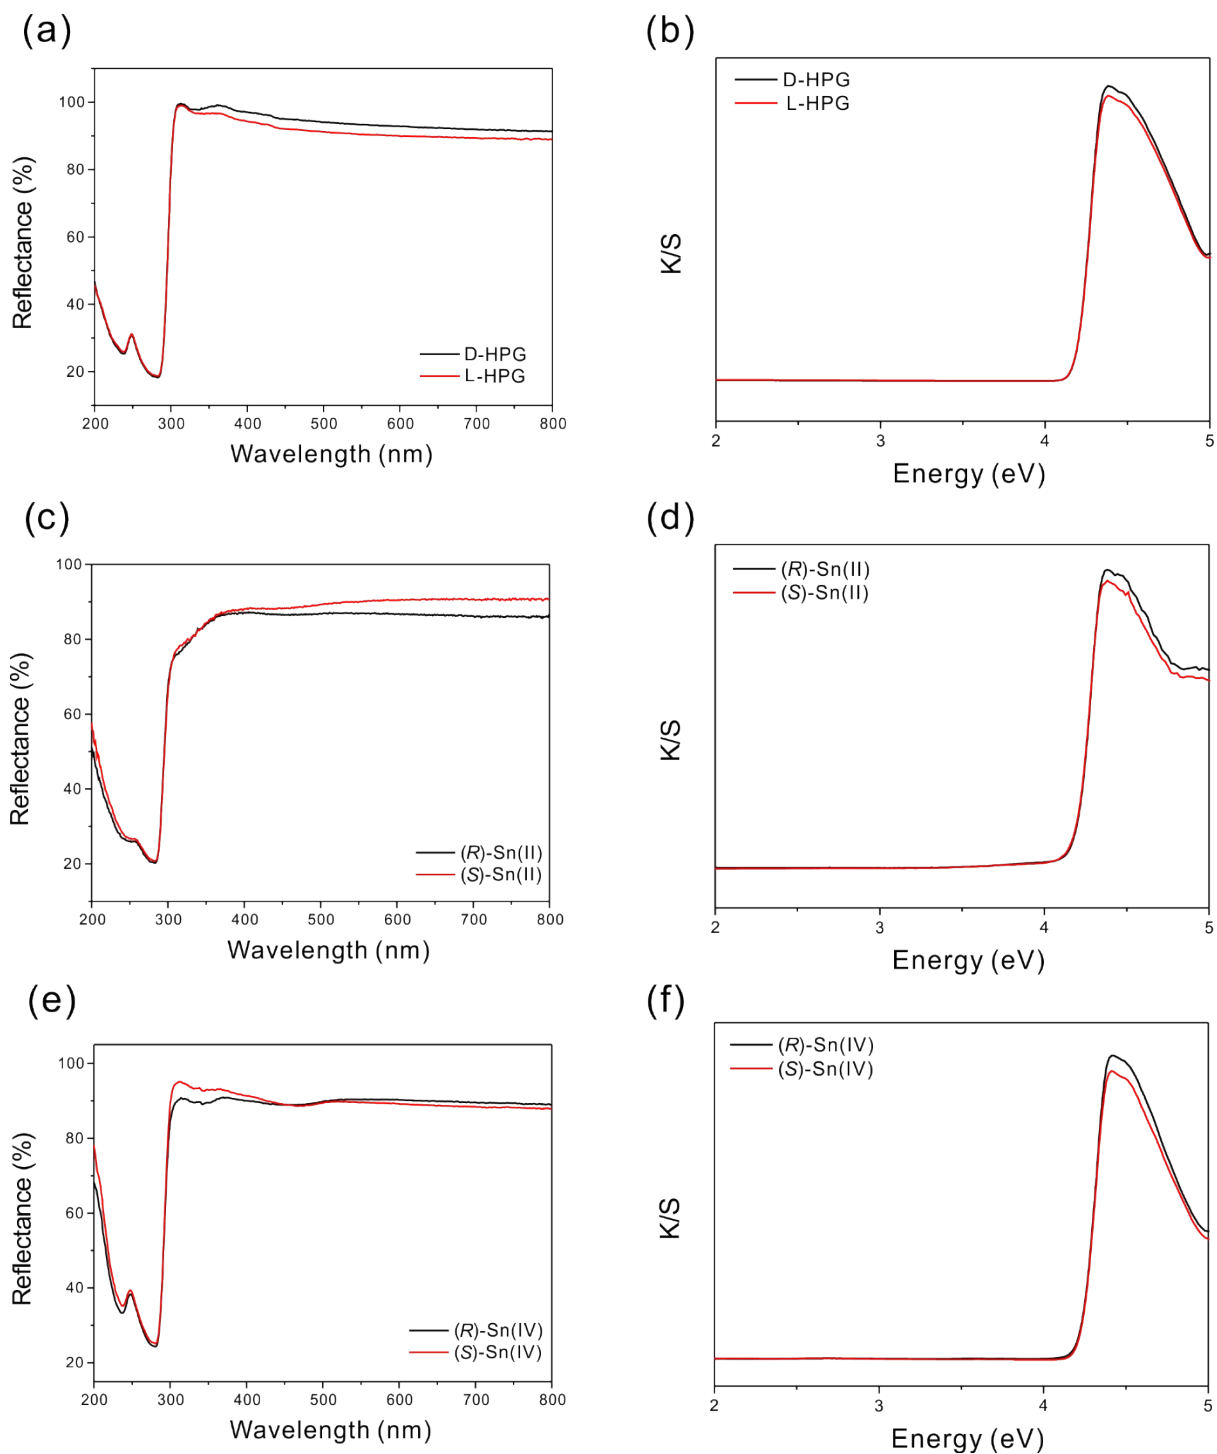

**Fig. S6** IR spectra for (*R*)-Sn(II), (*S*)-Sn(II), (*R*)-Sn(IV), and (*S*)-Sn(IV).

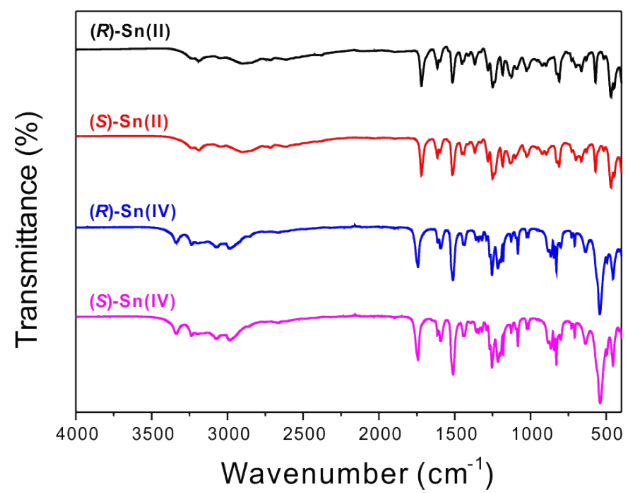

**Table S11.** Calculated dipole moments of (*R*)-Sn(II) and (*R*)-Sn(IV) (D = Debye).

| Compound                 | Unit                 | Magnitude     | Dipole moment (D)       |                         |          |
|--------------------------|----------------------|---------------|-------------------------|-------------------------|----------|
|                          |                      |               | <i>x</i>                | <i>y</i>                | <i>z</i> |
| <b>(<i>R</i>)-Sn(II)</b> | SnF <sub>3</sub> (1) | 7.47 D        | -6.7                    | -3.2                    | -0.79    |
|                          | SnF <sub>3</sub> (2) | 7.47 D        | 6.7                     | -3.2                    | 0.79     |
|                          | SnF <sub>3</sub> (3) | 7.62 D        | 6.48                    | 3.79                    | -1.28    |
|                          | SnF <sub>3</sub> (4) | 7.62 D        | -6.48                   | 3.79                    | 1.28     |
|                          | <b>Net</b>           | <b>1.18 D</b> | <b>0</b>                | <b>1.18</b>             | <b>0</b> |
| <b>(<i>R</i>)-Sn(IV)</b> | SnF <sub>6</sub> (1) | 8.58 D        | -3.55×10 <sup>-15</sup> | -7.11×10 <sup>-15</sup> | 8.58     |
|                          | SnF <sub>6</sub> (2) | 8.58 D        | 1.60×10 <sup>-14</sup>  | -2.97×10 <sup>-13</sup> | 8.58     |
|                          | SnF <sub>6</sub> (3) | 8.58 D        | -1.78×10 <sup>-15</sup> | 5.33×10 <sup>-15</sup>  | -8.58    |
|                          | SnF <sub>6</sub> (4) | 8.58 D        | -1.24×10 <sup>-14</sup> | 5.33×10 <sup>-15</sup>  | -8.58    |
|                          | <b>Net</b>           | <b>0 D</b>    | <b>0</b>                | <b>0</b>                | <b>0</b> |

**Fig. S7** Dipole moments and a net direction of SnF<sub>3</sub> trigonal pyramids in a unit cell for (*R*)-Sn(II).

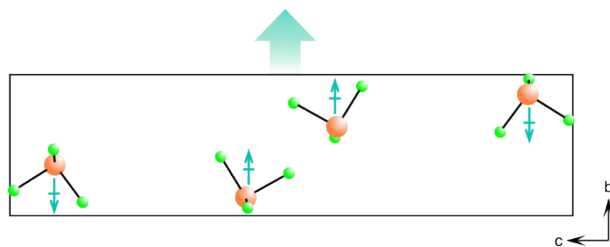



**Fig. S8** Dipole moments and a net direction of SnF<sub>6</sub> octahedra in a unit cell for (*R*)-Sn(IV).

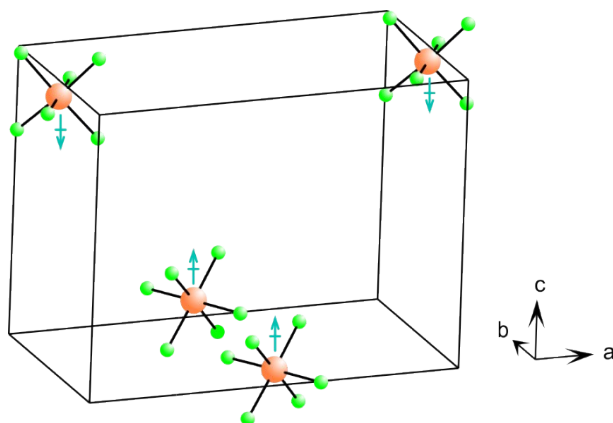

**Table S12.** The calculated distortion of  $[\text{SnF}_6]^{2-}$  octahedron for (*R*)-Sn(IV).

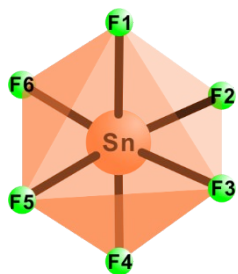

| Distance(Å)       |        | Angle(°)  |        |
|-------------------|--------|-----------|--------|
| Sn-F1             | 1.9608 | ∠F1 Sn F4 | 179.29 |
| Sn-F2             | 1.9448 | ∠F2 Sn F5 | 174.53 |
| Sn-F3             | 1.9448 | ∠F3 Sn F6 | 174.53 |
| Sn-F4             | 1.9609 |           |        |
| Sn-F5             | 1.9680 |           |        |
| Sn-F6             | 1.9680 |           |        |
| $\Delta d=0.0467$ |        |           |        |

**Fig. S9** Solid-state CD spectra of D-HPG, L-HPG, (*R*)-Sn(II), (*S*)-Sn(II), (*R*)-Sn(IV), and (*S*)-Sn(IV).

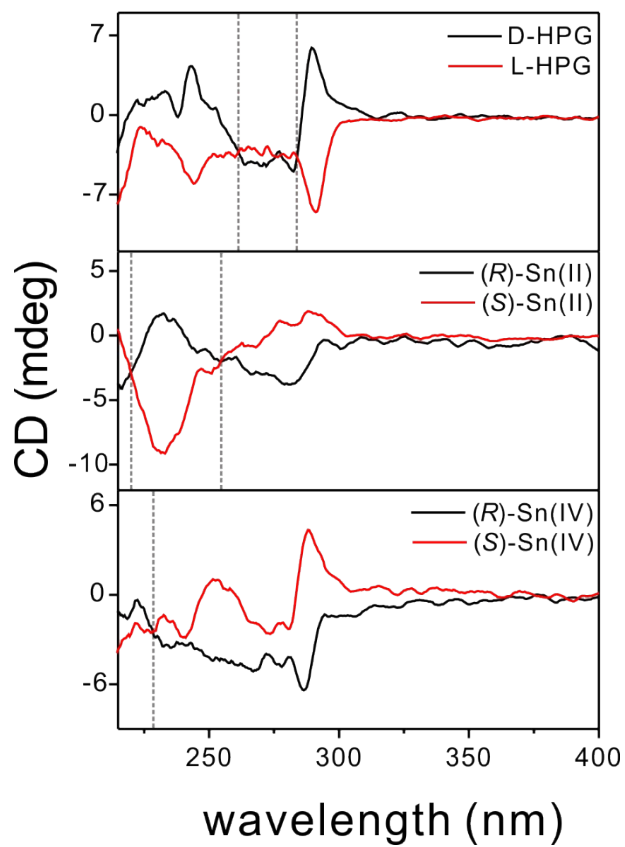

**Fig. S10** Band structures for (a) (*R*)-Sn(II), (b) (*S*)-Sn(II), (c) (*R*)-Sn(IV), and (d) (*S*)-Sn(IV).

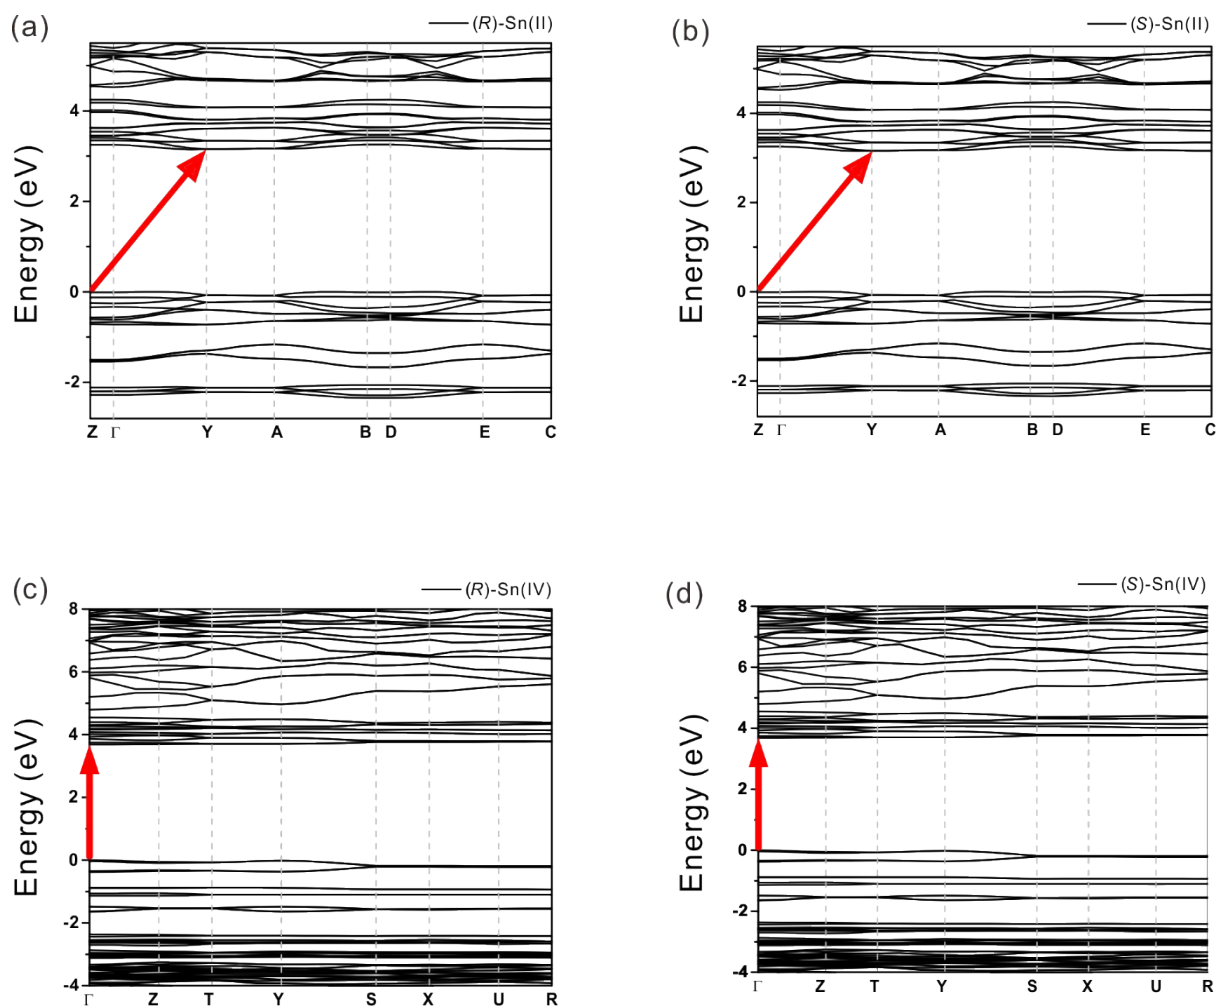

**Fig. S11** Total and partial density of states for (a) (*R*)-Sn(II), (b) (*S*)-Sn(II), (c) (*R*)-Sn(IV), and (d) (*S*)-Sn(IV).

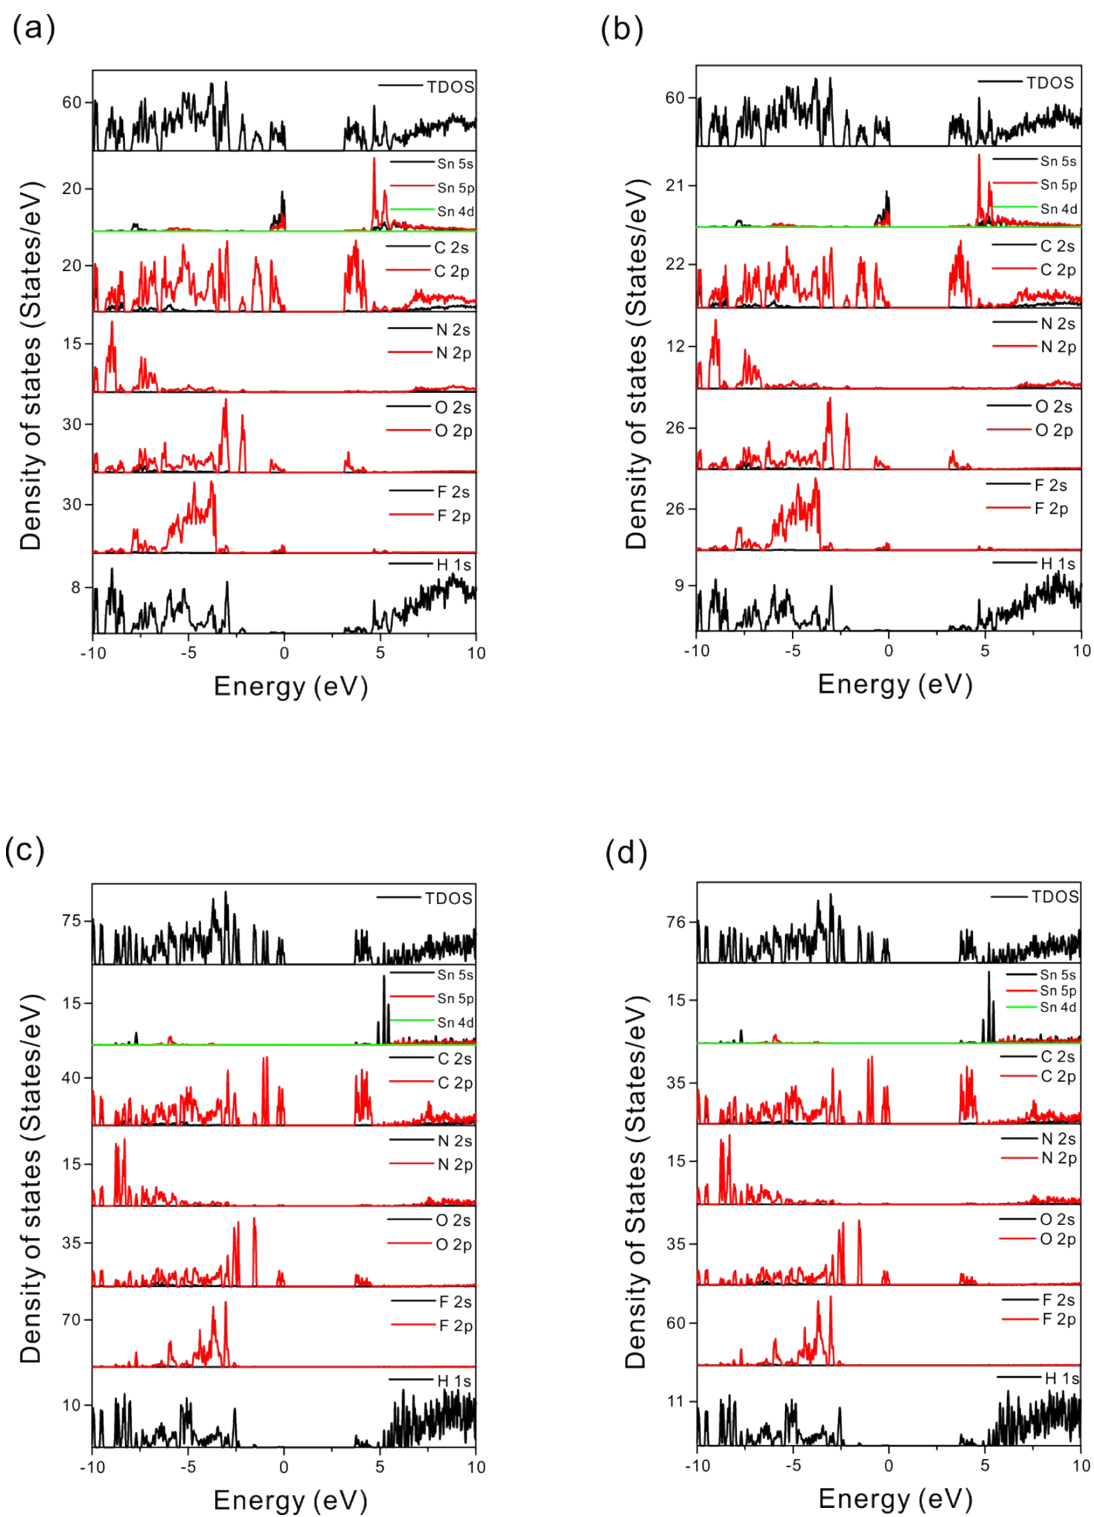

**Fig. S12** PXRD patterns revealing the stability of (*R*)-Sn(IV) in various solvents.

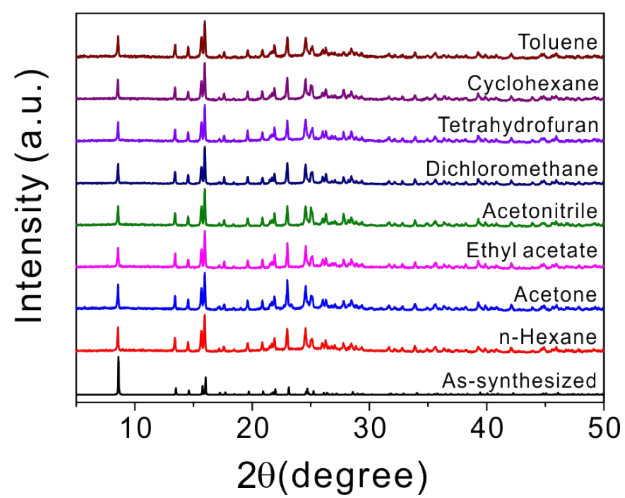

Supplement: d3dt03257d1.pdf [file d3dt03257d1.pdf]
